# Supplementary material for: Observed Differences between Males and Females in Surgically Treated Carpal Tunnel Syndrome Among Non-manual Workers: A Sensitivity Analysis of Findings from a Large Population Study
Source: PubMed Central journal article supplement — Ann Work Expo Health. 2018 Mar 20;62(4):505–15. doi: 10.1093/annweh/wxy015 (PMC5905650; doi:10.1093/annweh/wxy015), 2018-03-20
Supplement: wxy015_suppl_supplementary_material.pdf [file wxy015_suppl_supplementary_material.pdf]

## **Online Supplementary Material**

**Observed differences between males and females in surgically treated carpal tunnel syndrome among non-manual workers: a sensitivity-analysis of findings from a large population study. Supplementary material.**

Andrea Farioli<sup>a</sup>, PhD, Stefania Curti<sup>a</sup>, PhD, Roberta Bonfiglioli<sup>a</sup>, MD, Alberto Baldasseroni<sup>b</sup>, MD, Giovanna Spatari<sup>c</sup>, MD, Stefano Mattioli<sup>a</sup>, MD, Francesco Saverio Violante<sup>a</sup>, MD.

<sup>a</sup> Department of Medical and Surgical Sciences (DIMEC), Bologna University, Bologna, Italy

<sup>b</sup> Tuscany Regional Centre for Occupational Injuries and Diseases (CeRIMP), Florence, Italy.

<sup>c</sup> Department of Biomedical and Dental Sciences and Morphofunctional Imaging, Messina University, Messina, Italy

**Supplementary Table 1.** Classification of non-manual and manual workers based on available information.

|                    | <b>Tuscany discharge records</b>                                                                          | <b>ISTAT-2001 Classification of Occupations</b>                                                                                                     |
|--------------------|-----------------------------------------------------------------------------------------------------------|-----------------------------------------------------------------------------------------------------------------------------------------------------|
| Non-manual workers | Managers<br>Self-employed professionals<br>Entrepreneurs<br>Clerical workers<br>Associated professionals  | Legislators, senior officials and managers<br>Professionals<br>Technicians and associate professionals<br>Clerks                                    |
| Manual workers     | Skilled/unskilled manual workers<br>Service workers<br>Home-based workers<br>Self-employed manual workers | Service and sales workers<br>Craft, trades and agricultural skilled workers<br>Plant and machine operators and assemblers<br>Elementary occupations |

**Supplementary Figure 1.** Probability of receiving surgery after carpal tunnel syndrome diagnosis among women. Beta distribution (parameter  $\alpha = 269.55$ , parameter  $\beta = 333.45$ ) solved based on observed data (Pr 44.7%, 95% confidence intervals 40.7%–48.8%).

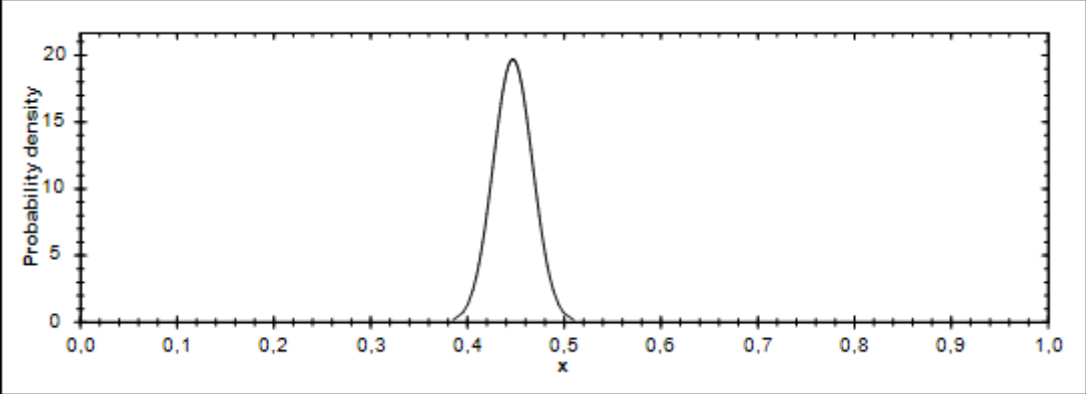

**Supplementary Figure 2.** Probability of receiving surgery after carpal tunnel syndrome diagnosis among men. Beta distribution (parameter  $\alpha = 69.64$ , parameter  $\beta = 123.36$ ) solved based on observed data (Pr 36.1%, 95% confidence intervals 29.3%–43.3%).

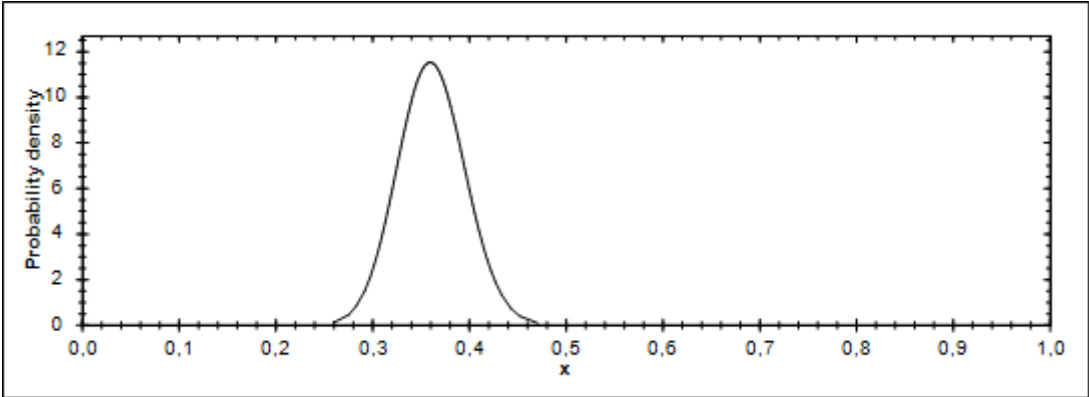

## Supplementary Appendix 1. Stata code written for the Monte Carlo simulation.

```
* Getting standard errors from observed data *
poisson cases b1.gender i.age, exposure(population)
global se_obs_gender=_se[0.gender]
global se_obs_age2=_se[2.age]
global se_obs_age3=_se[3.age]
global se_obs_age4=_se[4.age]
global se_obs_age5=_se[5.age]
global se_obs_age6=_se[6.age]
global se_obs_age7=_se[7.age]

* Stata program for Monte Carlo simulation *
capture program drop sim
program define sim, rclass
    preserve
    tempvar cases_adj
    gen `cases_adj'=round((1/rbeta(269.55,333.45)))*cases if gender==0
    replace `cases_adj'=round((1/rbeta(69.64,123.36)))*cases if gender==1
    poisson `cases_adj' b1.gender i.age, exposure(population)
    local adj_gender=exp(_b[0.gender]-invnorm(uniform())*$se_obs_gender)
    local adj_age2=exp(_b[2.age]-invnorm(uniform())*$se_obs_age2)
    local adj_age3=exp(_b[3.age]-invnorm(uniform())*$se_obs_age3)
    local adj_age4=exp(_b[4.age]-invnorm(uniform())*$se_obs_age4)
    local adj_age5=exp(_b[5.age]-invnorm(uniform())*$se_obs_age5)
    local adj_age6=exp(_b[6.age]-invnorm(uniform())*$se_obs_age6)
    local adj_age7=exp(_b[7.age]-invnorm(uniform())*$se_obs_age7)
    local HAL=rnormal(0.1327,0.0408)
    local HAL_max=0.2127
    local delta2=((_b[0.gender]-invnorm(uniform())*$se_obs_gender)-ln(2))/`HAL'
    local delta2_HAL_max=((_b[0.gender]-invnorm(uniform())*$se_obs_gender)- /*
    */ ln(2))/`HAL_max'
    local delta1=((_b[0.gender]-invnorm(uniform())*$se_obs_gender)-ln(1))/`HAL'
    local delta1_HAL_max=((_b[0.gender]-invnorm(uniform())*$se_obs_gender)- /*
    */ ln(1))/`HAL_max'
    return scalar adj_gender=`adj_gender'
    return scalar adj_age2=`adj_age2'
    return scalar adj_age3=`adj_age3'
    return scalar adj_age4=`adj_age4'
    return scalar adj_age5=`adj_age5'
    return scalar adj_age6=`adj_age6'
    return scalar adj_age7=`adj_age7'
    return scalar delta2=`delta2'
    return scalar delta1=`delta1'
    return scalar delta2_HAL_max=`delta2_HAL_max'
    return scalar delta1_HAL_max=`delta1_HAL_max'
    restore
end

* Monte Carlo simulation *
simulate adj_gender=r(adj_gender) adj_age2=r(adj_age2) adj_age3=r(adj_age3) /*
*/ adj_age4=r(adj_age4) adj_age5=r(adj_age5) adj_age6=r(adj_age6) adj_age7=r(adj_age7) /*
*/ delta1=r(delta1) delta1_HAL_max=r(delta1_HAL_max) delta2=r(delta2) /*
*/ delta2_HAL_max=r(delta2_HAL_max), reps(100000): sim

* Showing adjusted estimates and delta HAL *
foreach var in adj_gender adj_age2 adj_age3 adj_age4 adj_age5 adj_age6 adj_age7 delta1 /*
*/ delta1_HAL_max delta2 delta2_HAL_max{
    centile `var', centile(50 2.5 97.5)
}
}
```
